# Supplementary material
Source: HighWire-hosted journal article supplement (https://openheart.bmj.com/content/5/2/e000849)
Supplement: inline-supplementary-material-1 [file inline-supplementary-material-1.docx]

**Appendix 1**

*Selection criteria*

- Age 50 years or older
- Free of clinical CVD (history of myocardial infarction, stable or unstable angina, stroke or transient ischaemic attack)
- At least one of the following cardiovascular risk factors, assessed from the most recent data in the clinical record, or using anthropometry for obesity.
  - Dyslipidemia:
    - LDL-cholesterol levels ≥4.1 mmol/l (≥160 mg/dL)
    - HDL-cholesterol levels <1.036 mmol/l (<40 mg/dL) for men or <1.300 mmol/l (<50 mg/dL) for women
    - Triglyceride levels ≥1.7 mmol/l (≥150 mg/dL)
    - Receiving lipid-lowering medication
  - Hypertension
    - Systolic blood pressure (SBP) ≥140 mmHg
    - Diastolic blood pressure (DBP) ≥90 mmHg
    - Receiving antihypertensive medication
  - Smoking
    - Current or former smoker, with >100 cigarettes smoked in lifetime
  - Diabetes mellitus
    - Fasting plasma glucose ≥7.0 mmol/L (126mg/dL), or
    - On antidiabetic medication (insulin or oral medications)
  - Obesity
    - Body Mass Index (BMI) ≥30 kg/m2, or
    - Waist circumference ≥102cm in men or ≥88cm in women
